# Supplementary material for: Rabies Virus-Neutralizing Antibodies in Free-Ranging Invasive Wild Boars (Sus scrofa) from Brazil
Source: MDPI journal article supplement (doi:10.3390/pathogens13040303), 2024-04-07
Supplement: s1 [file s1]

Table S1: Summary of results obtained for wild boar samples in rapid fluorescent foci inhibition test, direct fluorescent antibody test, viral isolation, quantitative reverse transcription polymerase chain reaction, and histopathological techniques, Brazil, 2024.

| ID | Serum (n=72)     |               | Central Nervous System (n=75) |                   |                          |
|----|------------------|---------------|-------------------------------|-------------------|--------------------------|
|    | RIFFIT<br>(n=72) | DFA<br>(n=46) | VI<br>(n=46)                  | rt-qPCR<br>(n=24) | Histopathology<br>(n=48) |
| 1  | +                | np            | np                            | -                 | np                       |
| 2  | -                | np            | np                            | -                 | np                       |
| 3  | -                | np            | np                            | -                 | np                       |
| 4  | -                | np            | np                            | -                 | np                       |
| 5  | -                | np            | np                            | -                 | np                       |
| 6  | +                | np            | np                            | -                 | np                       |
| 7  | +                | np            | np                            | -                 | np                       |
| 8  | -                | np            | np                            | -                 | np                       |
| 9  | -                | np            | np                            | -                 | np                       |
| 10 | -                | -             | -                             | np                | np                       |
| 11 | -                | np            | np                            | -                 | np                       |
| 12 | np               | np            | np                            | -                 | np                       |
| 13 | -                | np            | np                            | -                 | np                       |
| 14 | np               | np            | np                            | -                 | np                       |
| 15 | -                | np            | np                            | -                 | np                       |
| 16 | -                | np            | np                            | -                 | np                       |
| 17 | -                | -             | -                             | np                | np                       |
| 18 | -                | np            | np                            | -                 | np                       |
| 19 | np               | np            | np                            | -                 | np                       |
| 20 | -                | np            | np                            | -                 | np                       |
| 21 | +                | np            | np                            | -                 | np                       |
| 22 | -                | np            | np                            | -                 | np                       |
| 23 | -                | np            | np                            | np                | np                       |
| 24 | -                | np            | np                            | np                | np                       |
| 25 | np               | np            | np                            | -                 | np                       |
| 26 | -                | np            | np                            | -                 | np                       |
| 27 | -                | np            | np                            | -                 | np                       |
| 28 | -                | np            | np                            | -                 | np                       |
| 20 | -                | np            | np                            | np                | np                       |
| 30 | -                | -             | -                             | np                | np                       |
| 31 | -                | np            | np                            | np                | np                       |
| 32 | -                | np            | np                            | np                | np                       |
| 33 | -                | np            | np                            | np                | np                       |
| 34 | -                | np            | np                            | np                | np                       |
| 35 | -                | -             | -                             | np                | -                        |
| 36 | -                | -             | -                             | np                | -                        |
| 37 | -                | -             | -                             | np                | -                        |
| 38 | -                | -             | -                             | np                | -                        |
| 39 | +                | -             | -                             | np                | -                        |
| 40 | -                | -             | -                             | np                | -                        |
| 41 | -                | -             | -                             | np                | -                        |
| 42 | +                | -             | -                             | np                | -                        |

|    |    |    |    |    |   |
|----|----|----|----|----|---|
| 43 | -  | -  | -  | np | - |
| 44 | -  | -  | -  | np | - |
| 45 | -  | -  | -  | np | - |
| 46 | +  | -  | -  | np | - |
| 47 | -  | -  | -  | np | - |
| 48 | -  | -  | -  | np | - |
| 49 | -  | -  | -  | np | - |
| 50 | -  | -  | -  | np | - |
| 51 | -  | -  | -  | np | - |
| 52 | -  | -  | -  | np | - |
| 53 | -  | -  | -  | np | - |
| 54 | -  | -  | -  | np | - |
| 55 | np | np | np | np | - |
| 56 | -  | np | np | np | - |
| 57 | -  | -  | -  | np | - |
| 58 | -  | -  | -  | np | - |
| 59 | -  | -  | -  | np | - |
| 60 | -  | -  | -  | np | - |
| 61 | -  | -  | -  | np | - |
| 62 | -  | -  | -  | np | - |
| 63 | -  | -  | -  | np | - |
| 64 | -  | -  | -  | np | - |
| 65 | -  | -  | -  | np | - |
| 66 | -  | -  | -  | np | - |
| 67 | -  | -  | -  | np | - |
| 68 | -  | -  | -  | np | - |
| 69 | -  | -  | -  | np | - |
| 70 | -  | -  | -  | np | - |
| 71 | np | np | np | np | - |
| 72 | -  | np | np | np | - |
| 73 | -  | -  | -  | np | - |
| 74 | -  | -  | -  | np | - |
| 75 | -  | -  | -  | np | - |
| 76 | -  | -  | -  | np | - |
| 77 | -  | -  | -  | np | - |
| 78 | np | np | np | np | - |
| 79 | -  | -  | -  | np | - |
| 80 | np | -  | -  | np | - |
| 81 | np | -  | -  | np | - |
| 82 | np | -  | -  | np | - |

---

ID: identification; RIFFIT: rapid fluorescent foci inhibition test; DFA: direct fluorescent antibody test;

VI: viral isolation; rt-qPCR: quantitative reverse transcription polymerase chain reaction.

+ positive; - negative; np not performed.
